# Supplementary material
Source: PubMed Central journal article supplement (PMC3944903)
Supplement: mmc1.pdf [file mmc1.pdf]

# Supporting Material for Spatiotemporal Evolution of Erythema Migrans, the Hallmark Rash of Lyme Disease

Dhruv K. Vig and Charles W. Wolgemuth

## Supplemental Figure

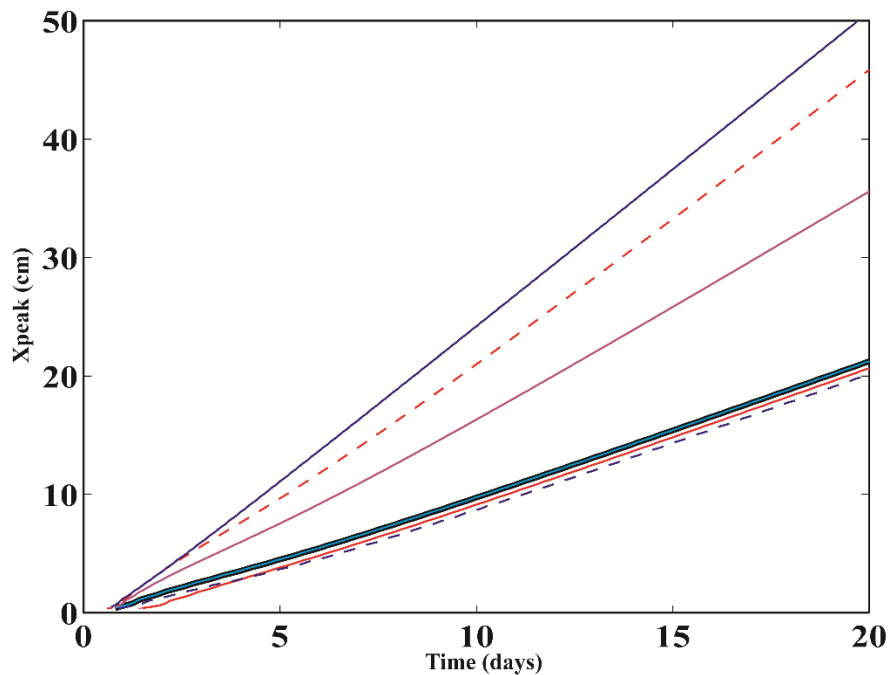

**Figure S1.** The effect of the parameters on the spreading velocity. A spreading velocity of 1 cm/day (black) was compared with changes in the model's parameters. Simulations were performed under the following various conditions: a bacterial replication rate,  $r \sim 4 \text{ days}^{-1}$  (blue), bacterial diffusion coefficient,  $D \sim 5 \text{ cm}^2/\text{day}$  (dashed red), the absence of stationary spirochetes,  $k_{on} \sim 0 \text{ days}^{-1}$  (magenta), a chemotaxis constant,  $\chi \sim 0.25 \text{ cm}^5\text{day}^{-1}$  (cyan), a macrophage activation rate,  $a \sim 1 \text{ day}^{-1}$  (red), and a macrophage clearing rate,  $d \sim 1$  (dashed blue). The spirochete clearing rate due to phagocytosis was found to be equal to changes in the macrophage activation rate.

## Supplemental Table of Parameters

**Table S1. List of parameters and their values for the model.**

| Parameters                  | Symbol    | Value                              | Reference          |
|-----------------------------|-----------|------------------------------------|--------------------|
| Diffusion coefficient       | $D$       | $1\text{ cm}^2\text{ day}^{-1}$    | $v^2 k_{off}^{-1}$ |
| Spirochete replication rate | $r$       | $2\text{ days}^{-1}$               | (18)               |
| Phagocytosis rate           | $c$       | $5\text{ days}^{-1}$               | Estimated          |
| Dermal binding constant     | $k_{on}$  | $100\text{ days}^{-1}$             | (4)                |
| Dermal release constant     | $k_{off}$ | $50\text{ days}^{-1}$              | (4)                |
| Chemotaxis constant         | $\chi$    | $0.05\text{ cm}^5\text{ day}^{-1}$ | Estimated          |
| Macrophage activation       | $a$       | $1\text{ day}^{-1}$                | (8)*               |
| Macrophage clearing         | $d$       | $0.05 - 0.3\text{ day}^{-1}$       | (19)               |
| Spirochete velocity         | $v$       | $1 - 5\text{ }\mu\text{m s}^{-1}$  | (4)                |

\*value estimated based on the data in this reference.

### Supporting Movies Legends

**Movie S1:** Time series showing a radial slice through a developing homogeneous rash. Blue lines denote the density of the spirochetes and the red lines show the density of the macrophages.

**Movie S2:** Time series showing a radial slice through a developing central erythema. Blue lines denote the density of the spirochetes and the red lines show the density of the macrophages.

**Movie S3:** Time series showing a radial slice through a developing central clearing rash. Blue lines denote the density of the spirochetes and the red lines show the density of the macrophages.

**Movie S4:** Time series showing the simulated spatiotemporal evolution of a homogeneous erythema. The red coloring tracks the macrophage density.

**Movie S5:** Time series showing the simulated spatiotemporal evolution of a central erythema. The red coloring tracks the macrophage density.

**Movie S6:** Time series showing the simulated spatiotemporal evolution of a central clearing rash. The red coloring tracks the macrophage density.

**Movie S7:** Simulation of the spatiotemporal clearing of a homogeneous erythema during the time course of a typical 30 day antibiotic treatment.

**Movie S8:** Simulation of the spatiotemporal clearing of a central erythema during the time course of a typical 30 day antibiotic treatment.

**Movie S9:** Simulation of the spatiotemporal clearing of a central clearing rash during the time course of a typical 30 day antibiotic treatment.
